# Supplementary material for: Theoretical design of three-dimensional non-fullerene acceptor materials based on an arylenediimide unit towards high efficiency organic solar cells
Source: Royal Society of Chemistry journal article supplement (doi:10.1039/c6nj03932d), 2017-01-01
Supplement: c6nj03932d1.pdf [file c6nj03932d1.pdf]

## Electronic Supplementary Information

### Theoretical Design of Three-Dimensional Non-fullerene Acceptor Materials Based on Arylenediimide Unit towards High Efficiency Organic Solar Cells

Qing-Qing Pan,<sup>a</sup> Shuang-Bao Li,<sup>a</sup> Yong Wu,<sup>b</sup> Ji Zhang,<sup>c</sup> Hai-Bin Li,<sup>a</sup> Yun Geng<sup>\*a</sup>, Min Zhang<sup>a</sup>  
and Zhong-Min Su<sup>\*a</sup>

---

<sup>a</sup> *Institute of Functional Material Chemistry, Faculty of Chemistry, Northeast Normal University, Chang Chun 130024, Jilin, P. R. China. E-mail: gengy575@nenu.edu.cn; zmsu@nenu.edu.cn*

<sup>b</sup> *School of Pharmaceutical Sciences, Changchun University of Chinese Medicine, 1035 Boshuo Road, Changchun, 130117, PR China*

<sup>c</sup> *College of chemistry and life science, Changchun University of Technology, ChangChun, 130012, Jilin, P. R. China.*

## Contents

|                                                                                                                                                                                            |             |
|--------------------------------------------------------------------------------------------------------------------------------------------------------------------------------------------|-------------|
| 1 Computational methods and model                                                                                                                                                          | (Page S2-3) |
| 2 The computational methods about <b>DBI</b> , <b>PC<sub>61</sub>BM</b> and <b>DBFI-T</b> systems                                                                                          | (Page S3)   |
| <b>Figure S1.</b> Experimental and simulated absorption spectra for <b>DBFI-T</b>                                                                                                          | (Page S4)   |
| <b>Figure S2.</b> The starting interface geometry in dimer                                                                                                                                 | (Page S4)   |
| <b>Figure S3</b> a) Molecular orbitals of the <b>PSEHTT/DBFI-T</b> interface b) The optimized geometry of the <b>PSEHTT/DBFI-T</b> interface.                                              | (Page S5)   |
| <b>Figure S4</b> a) Molecular orbitals of the <b>PSEHTT/1</b> interface b) The optimized geometry of the <b>PSEHTT/1</b> interface                                                         | (Page S5)   |
| <b>Figure S5</b> a) Molecular orbitals of the <b>PSEHTT/2</b> interface b) The optimized geometry of the <b>PSEHTT/2</b> interface                                                         | (Page S6)   |
| <b>Figure S6</b> Oscillation strengths of vertical excitations at the <b>PSEHTT/DBI-P2</b> and <b>PSEHTT/PC<sub>61</sub>BM</b> interface                                                   | (Page S6)   |
| <b>Figure S7</b> Molecular orbitals of the <b>PSEHTT/DBFI-P2</b> interface                                                                                                                 | (Page S7)   |
| <b>Figure S8</b> Molecular orbitals of the <b>PSEHTT/PC<sub>61</sub>BM</b> interface                                                                                                       | (Page S7)   |
| <b>Table S1</b> Calculated the absorption wavelengths ( $\lambda$ ), oscillator strength ( $f$ ), and dominant excitation character for of molecules <b>DBFI-T</b> , <b>1</b> and <b>2</b> | (Page S8)   |
| <b>Table S2</b> Calculated the electronic couplings $V$ (eV) of <b>PSEHTT/DBI-P2</b> , <b>PSEHTT/PC<sub>61</sub>BM</b> and <b>PSEHTT/DBFI-T</b> interface                                  | (Page S8)   |

## 1 Computational methods and model

The electronic coupling  $V_{DA}$  have been evaluated by the generalized Milliken-Hush (GMH) formalism<sup>1</sup> which refers to a vertical transition from the initial state to the final state.  $V_{DA}$  is written as

$$V_{DA} = \frac{\mu_{tr}\Delta E}{\sqrt{(\Delta\mu)^2 + 4(\mu_{tr})^2}} \quad (S1)$$

Where  $\Delta\mu$  represents the dipole moment difference between the initial and final states,  $\Delta E$  is the energy difference and  $\mu_{tr}$  is the transition dipole between these two states.

Regarding the electronic couplings from eq S1, here, we calculated  $\Delta\mu$  by using a finite field method on the transition excitation energy, which can be expressed as<sup>2, 3</sup>

$$E_{EXC}(F) = E_{EXC}(0) - \Delta\mu F - 0.5\Delta\alpha F^2 \quad (S2)$$

Where  $F$  is the static electric field,  $E_{EXC}$  and  $\Delta\alpha$  are the excitation energy at zero field and the change in the polarizability, respectively.  $\Delta\mu$  is the dipole moment difference between the initial and the final state. The orientation of the external static field is along the y axis shown in Figure 2, and  $\Delta\mu$  could be obtained from eq S8. The excitation energy of the D/A interface were calculated based on the TD-DFT theory with CAM-B3LYP functional and 6-31G(d, p) basis set.

Generally, for exciton, the electron and the hole often experience a strong attraction, which is called exciton binding energy ( $E_b$ )<sup>4</sup>. The  $E_b$  has to be overcome for the charges to escape from the D/A interface and migrate towards the cathode and the anode.

$$E_b = \Delta E_{H-L} - E_{S1} \quad (S3)$$

$\Delta E_{H-L}$  is the energy difference between HOMO and LUMO, and  $E_{S1}$  is the first singlet excitation energy of acceptor. Based on this formulation, we calculated  $E_b$  at the B3LYP/6-31G(d, p) level. Gibbs free energy change ( $\Delta G_{CR}$ ) of charge recombination process can be estimated with<sup>5</sup>

$$\Delta G_{CR} = E_{IP}(D) - E_{EA}(A) \quad (S4)$$

Where  $E_{IP}(D)$  represents the ionization potential of the donor,  $E_{EA}(A)$  is the electron affinity of the acceptor. As an approximation, the Gibbs free energy change ( $\Delta G_{CS}$ ) of charge-separation process is estimated from the Rehm-Weller equation<sup>5</sup>.

$$\Delta G_{CS} = -\Delta G_{CR} - \Delta E_{S1} - \Delta E_b \quad (S5)$$

$E_{S1}$  and  $E_b$  are the energy of lowest excited state of free-base donor and exciton binding energy, respectively.

The reorganization energy  $\lambda$  is normally decomposed into internal energy ( $\lambda_i$ ) and external energy ( $\lambda_s$ ). The internal reorganization energy can be estimated from the exciton dissociation and charge recombination processes<sup>6</sup>. The reorganization energy of the charge dissociation,  $\lambda_{i-CS}$ , can be estimated according to the eqs. (S6-8):

$$\lambda_{i1} = [E^{D^+}(Q_P) + E^A(Q_P)] - [E^{D^+}(Q_R) + E^A(Q_R)] \quad (S6)$$

$$\lambda_{i2} = [E^{D^+}(Q_R) + E^{A^-}(Q_R)] - [E^{D^+}(Q_P) + E^{A^-}(Q_P)] \quad (S7)$$

$$\lambda_{i-CS} = (\lambda_{i1} + \lambda_{i2})/2 \quad (S8)$$

The reorganization energy of the charge recombination process,  $\lambda_{i-CR}$ , is given by:

$$\lambda_{i2} = [E^{D^+}(Q_R) + E^{A^-}(Q_R)] - [E^{D^+}(Q_P) + E^{A^-}(Q_P)] \quad (S9)$$

$$\lambda_{i3} = [E^D(Q_R) + E^A(Q_R)] - [E^D(Q_P) + E^A(Q_P)] \quad (\text{S10})$$

$$\lambda_{i-CR} = (\lambda_{i2} + \lambda_{i3})/2 \quad (\text{S11})$$

Where  $\lambda_{i1}$  represents the difference between the energy of the excited-state (D\*A) reactants in the geometry characteristic of the products and that in their equilibrium geometry,  $\lambda_{i2}$  is the difference between the energy of the ionic-state (D+A) reactants in the geometry characteristic of the reactants and that in their equilibrium geometry,  $\lambda_{i3}$  is the difference between the energy of the ground-state (DA) reactants in the characteristic of the products and that in their equilibrium geometry.  $Q_P$  and  $Q_R$  are the equilibrium geometries of the products and reactants, respectively.

In the interface model, external reorganization energy accounts for an important fraction of  $\lambda$ , and can't be ignored. The calculation of external reorganization energy  $\lambda_s$  is based on the classical dielectric continuum model with the quantum mechanics methods and it is given by

$$\lambda_s = \Delta q^2 \left( \frac{1}{2d_D} + \frac{1}{2d_D} - \frac{1}{d_{DA}} \right) \left( \frac{1}{\epsilon_{op}} - \frac{1}{\epsilon_o} \right) \quad (\text{S12})$$

Where  $d_{DA}$  represents the mass-center distance between the donor and the acceptor,  $d_D$  and  $d_A$  are the radii of the donor and acceptor, respectively.  $\epsilon_{op}$  is the optical-frequency dielectric constant and the typical value (2.25) was used in our calculations<sup>7</sup>.  $\epsilon_o$  is the zero-frequency dielectric constant of the medium. Recently, it has reported that the  $\epsilon_o$  is in the range of 3.4-4 for the D/A blend from the experiments. As a consequence, 3.7, which is the median value was used as a constant for  $\epsilon_o$  in our calculations.

## 2 The computational methods about **BFI-P2**, **PC<sub>61</sub>BM** and **DBFI-T** systems

The ground-state geometries of **BFI-P2**, **PC<sub>61</sub>BM** and **DBFI-T** were optimized at the B3LYP/6-31G(d, p) level. For interface models, the D/A interface models were placed together at 3.5 Å distance. The ground-state geometries were optimized at the B3LYP-D2/6-31G(d, p) level. In addition, the excited state were calculated at the TD-CAM-B3LYP method with 6-31G(d, p) basis set. The computational details of other parameters (total reorganization energy, electronic coupling, and Gibbs free energy change) have been presented in section 1. All of the above calculations were carried out by Gaussian 09 software package.

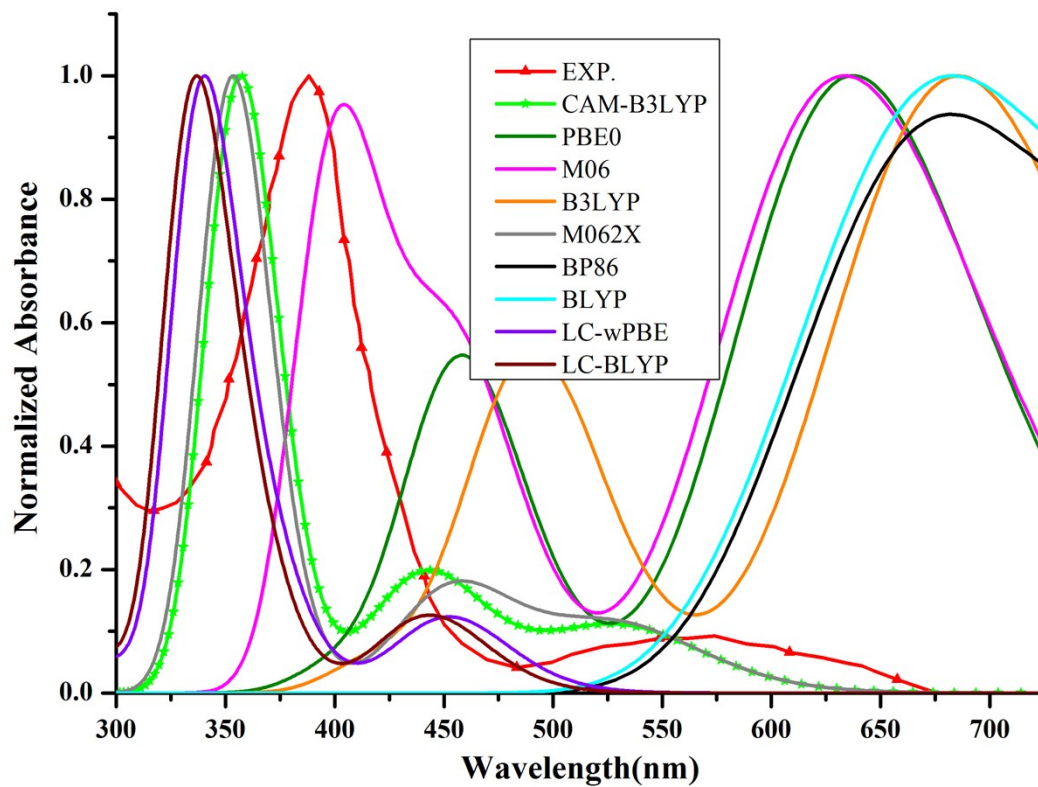

Figure S1. Experimental and simulated absorption spectra for **DBFI-T**.

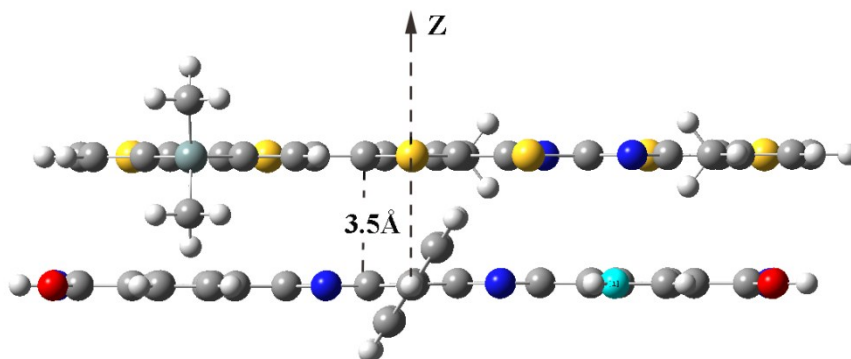

Figure S2. The starting interface geometry in dimer.

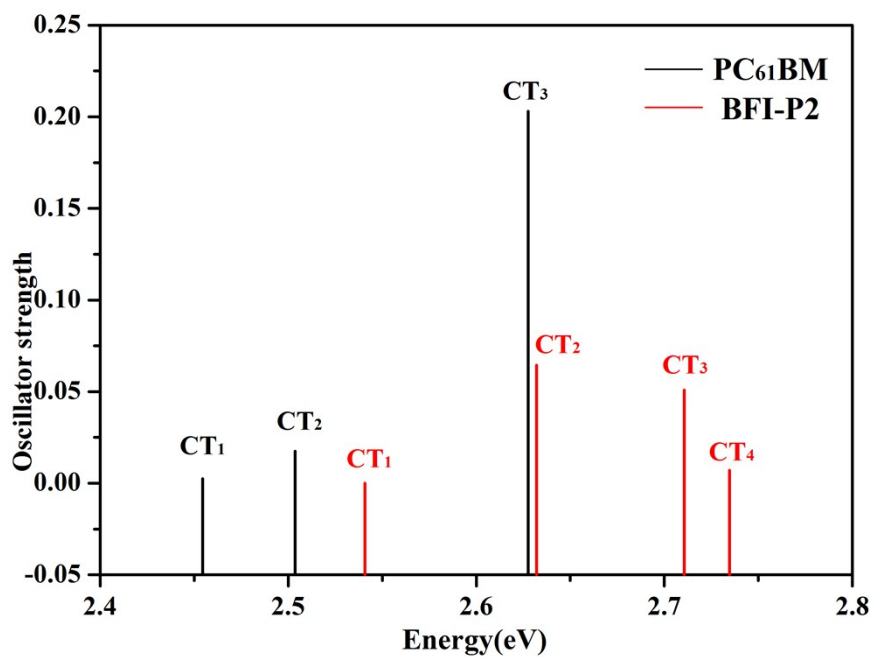

**Figure S3.** Oscillation strengths of vertical excitations at the **PSEHTT/BFI-P2** and **PSEHTT/PC<sub>61</sub>BM** interface at the CAM-B3LYP/6-31G(d, p) level.

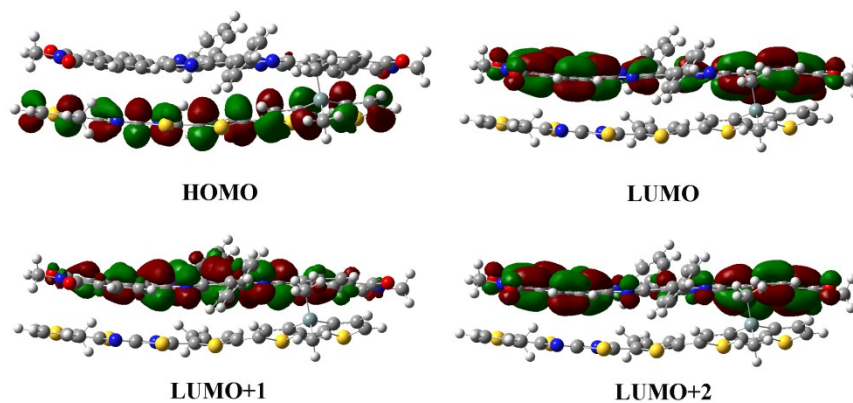

**Figure S4.** Molecular orbitals of the **PSEHTT/BFI-P2** interface in the CAM-B3LYP/6-31G (d, p) level.

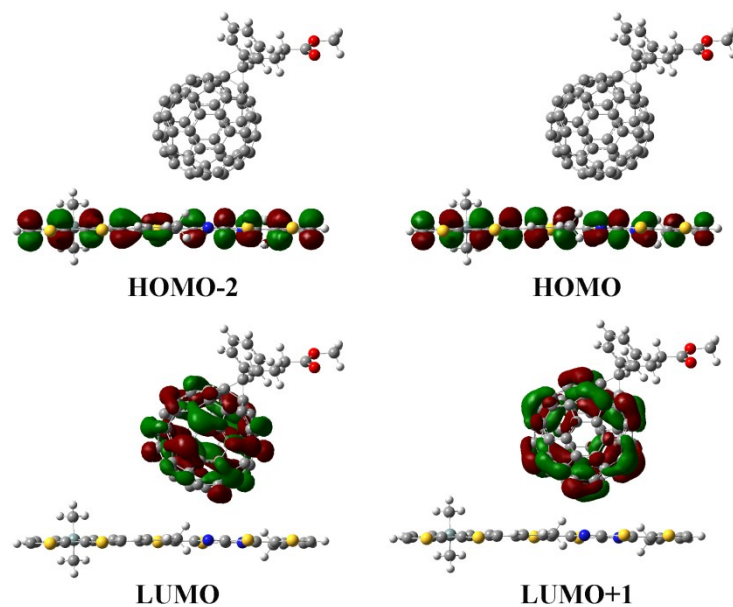

**Figure S5.** Molecular orbitals of the **PSEHTT/PC<sub>61</sub>BM** interface in the CAM-B3LYP/6-31G(d, p) level.

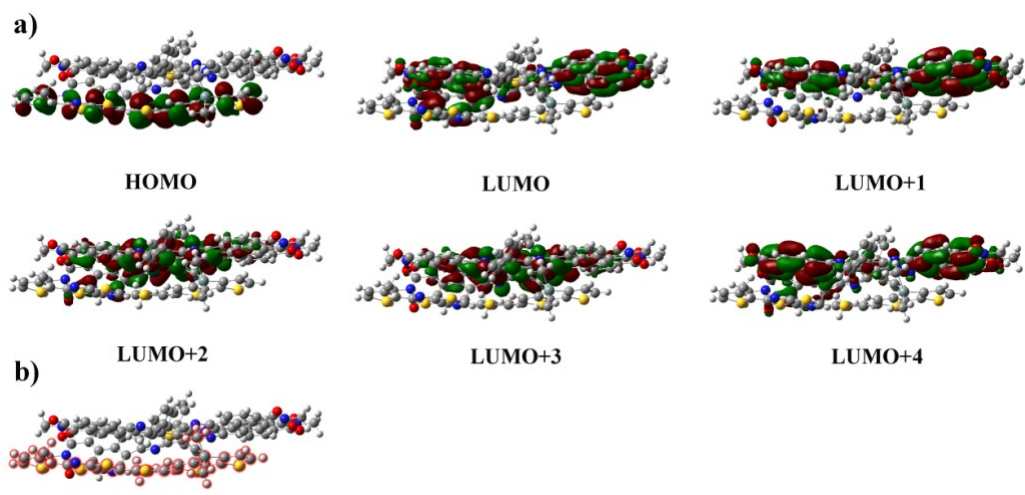

**Figure S6** a) Molecular orbitals of the **PSEHTT/DBFI-T** interface calculated at the CAM-B3LYP/6-31G(d, p) level. b) The optimized geometry of the **PSEHTT/DBFI-T** interface, and red color refers to the donor material.

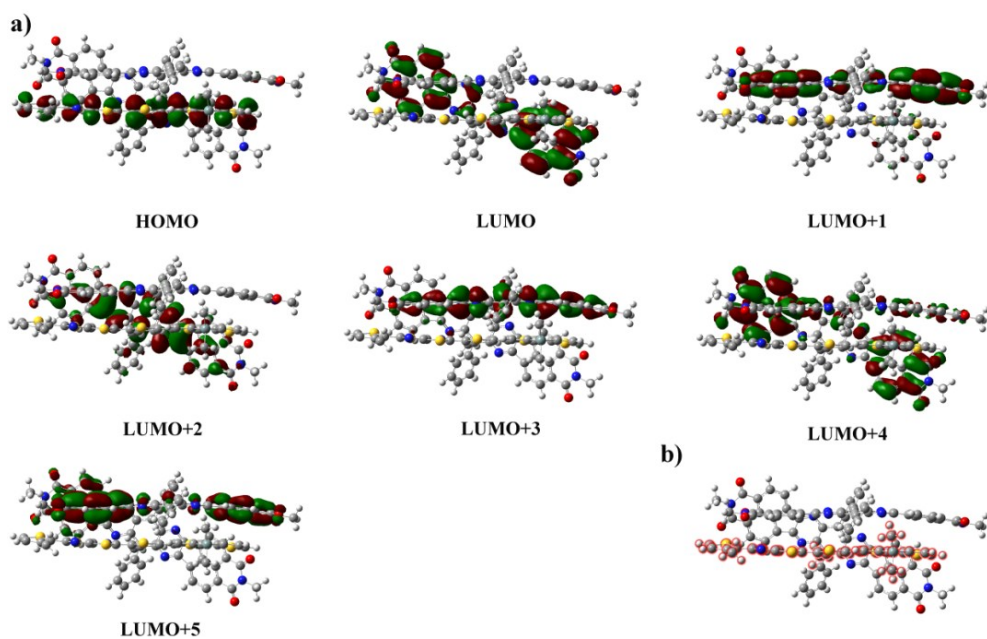

**Figure S7** a) Molecular orbitals of the **PSEHTT/1** interface calculated at the CAM-B3LYP/6-31G(d, p) level. b) The optimized geometry of the **PSEHTT/1** interface, and red color refers to the donor material.

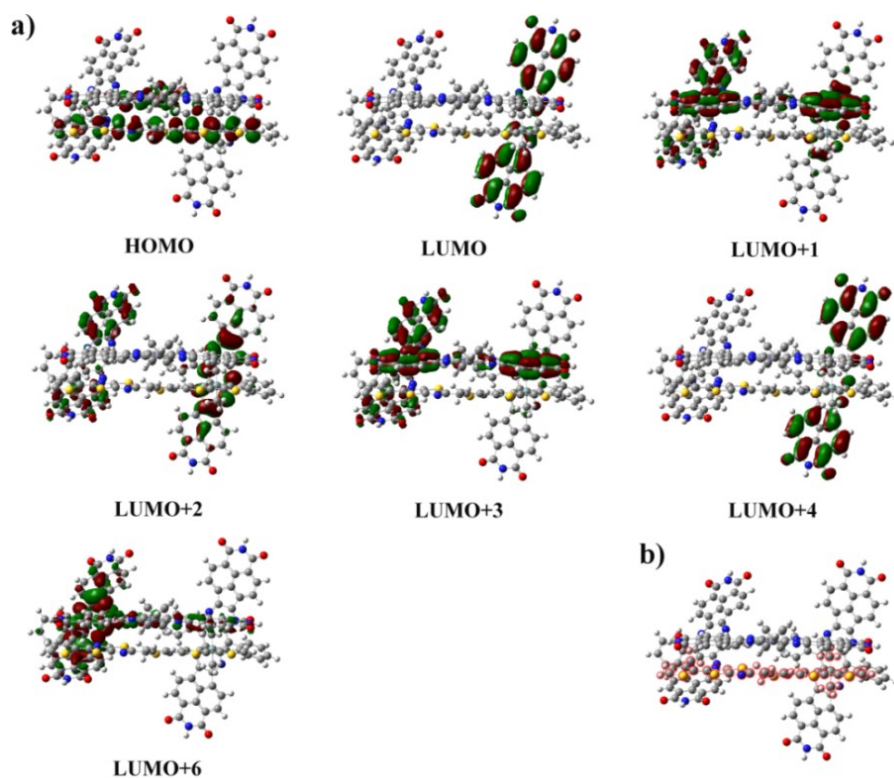

**Figure S8** a) Molecular orbitals of the **PSEHTT/2** interface calculated at the CAM-B3LYP/6-31G(d, p) level. b) The optimized geometry of the **PSEHTT/2** interface, and red color refers to the donor material.



**Table S1.** Calculated the absorption wavelengths ( $\lambda$ ), oscillator strength ( $f$ ), and dominant excitation character for of molecules **DBFI-T**, **1** and **2** at CAM-B3LYP/6-31G(d, p) level.

| Molecule        | States          | $\lambda$ (nm) | $f$            | Transitions <sup>(a)</sup> |
|-----------------|-----------------|----------------|----------------|----------------------------|
| <b>DBFI-T</b>   | S <sub>1</sub>  | 530.7          | 0.6164         | H→L (+39%)                 |
|                 |                 |                |                | H→L+1 (+44%)               |
|                 | S <sub>3</sub>  | 448.7          | 0.5501         | H→L+1 (+32%)               |
|                 |                 |                |                | H→L+2 (+23%)               |
|                 | S <sub>4</sub>  | 432.9          | 0.5197         | H→L+2 (+46%)               |
|                 |                 |                |                | H→L (+23%)                 |
|                 | S <sub>9</sub>  | 363.2          | 0.8609         | H-3→L (+18%)               |
| H-3→L+1 (+25%)  |                 |                |                |                            |
| S <sub>12</sub> | 356.5           | 3.8682         | H-1→L+2 (+12%) |                            |
|                 |                 |                | H-1→L (+9%)    |                            |
| S <sub>16</sub> | 345.9           | 0.4126         | H-1→L+1 (+11%) |                            |
|                 |                 |                | H-1→L+2 (+12%) |                            |
| <b>1</b>        | S <sub>1</sub>  | 420.4          | 0.2706         | H-1→L+2 (+41%)             |
|                 |                 |                |                | H→L+3 (+48%)               |
|                 | S <sub>3</sub>  | 404.7          | 0.5190         | H-1→L (+36%)               |
|                 |                 |                |                | H→L+1 (+34%)               |
|                 | S <sub>4</sub>  | 403.2          | 1.4291         | H-1→L+1 (+42%)             |
|                 |                 |                |                | H→L (+34%)                 |
| S <sub>8</sub>  | 356.2           | 0.9556         | H-3→L+2 (+17%) |                            |
|                 |                 |                | H-2→L+2 (+17%) |                            |
| S <sub>10</sub> | 352.8           | 4.0351         | H-3→L+2 (+18%) |                            |
|                 |                 |                | H-3→L+3 (+21%) |                            |
| <b>2</b>        | S <sub>1</sub>  | 466.8          | 0.4225         | H→L+3 (+59%)               |
|                 |                 |                |                | S <sub>2</sub>             |
|                 | S <sub>4</sub>  | 435.6          | 0.4778         | H→L (+71%)                 |
|                 |                 |                |                | S <sub>6</sub>             |
|                 | H→L (+34%)      |                |                |                            |
|                 | S <sub>11</sub> | 379.08         | 0.8218         | H-1→L+2 (+24%)             |
|                 |                 |                |                | H→L+2 (+24%)               |
|                 | S <sub>12</sub> | 378.0          | 0.6436         | H-1→L (+31%)               |
| H→L (+24%)      |                 |                |                |                            |
| S <sub>20</sub> | 354.5           | 2.2890         | H-5→L+3 (+41%) |                            |
|                 |                 |                | H-5→L+5 (+27%) |                            |

<sup>(a)</sup>H denotes HOMO and L denotes LUMO.

**Table S2.** Calculated the electronic couplings  $V$  (eV) of **PSEHTT/BFI-P2**, **PSEHTT/PC<sub>61</sub>BM** and **PSEHTT/DBFI-T** interface.

| Excited | $V_{\text{PSEHTT/BFI-P2}}$ | $V_{\text{PSEHTT/PC}_{61}\text{BM}}$ | $V_{\text{PSEHTT/DBFI-T}}$ |
|---------|----------------------------|--------------------------------------|----------------------------|
| 1       | 0.1171                     | -0.9409                              | 0.0368                     |
| 2       | -0.2410                    | 0.2482                               | -0.0458                    |

---

|    |         |         |         |
|----|---------|---------|---------|
| 3  | -0.2706 | 0.1974  | -0.6340 |
| 4  | 0.3974  | 0.0616  | 0.2024  |
| 5  | 0.4269  | 0.4277  | 1.1712  |
| 6  | -1.4962 | 0.3379  | -0.3561 |
| 7  | -0.2249 | 0.4089  | 1.0781  |
| 8  | 0.4089  | 0.0261  | 1.3224  |
| 9  | -1.4798 | -0.7618 | 0.0719  |
| 10 | -0.3546 | 0.0490  | 0.1416  |

---

- 1 A. A. Voityuk, *J. Chem. Phys.*, 2006, **124**, 064505.
- 2 Y. Li, T. Pullerits, M. Zhao and M. Sun, *J. Phys. Chem. C*, 2011, **115**, 21865.
- 3 P. Kjellberg, Z. He and T. Pullerits, *J. Phys. Chem. B*, 2003, **107**, 13737.
- 4 T. M. Clarke and J. R. Durrant, *Chem. Rev.*, 2010, **110**, 6736.
- 5 G. J. Kavarnos and N. J. Turro, *Chem. Rev.*, 1986, **86**, 401.
- 6 V. Lemaure, M. Steel, D. Beljonne, J.-L. Brédas and J. Cornil, *J. Am. Chem. Soc.*, 2005, **127**, 6077.
- 7 C. F. Madigan and V. Bulovic, *Phys. Rev. Lett.*, 2003, **91**, 247403.
